# Supplementary material for: Direct cyanidation of silver sulfide by heterolytic C–CN bond cleavage of acetonitrile
Source: Royal Society of Chemistry journal article supplement (doi:10.1039/d0ra00940g), 2020-01-01
Supplement: d0ra00940g1.pdf [file d0ra00940g1.pdf]

## Direct Cyanidation of Silver Sulfide by Heterolytic C-CN Bond Cleavage of Acetonitrile

Biraj Das,<sup>‡a</sup> Pinku Saikia,<sup>‡a</sup> Mukesh Sharma,<sup>a</sup> Manash J. Baruah,<sup>a</sup> Subhasish Roy,<sup>b</sup> Kusum K. Bania<sup>a\*</sup>

<sup>a</sup>*Department of Chemical Sciences, Tezpur University, Assam, India, 784028.*

<sup>b</sup>*Department of Chemistry, School of Applied Sciences, University of Science and Technology, Meghalaya, Techno City, Kling Road, Baridua 9th Mile, Ri-Bhoi, Meghalaya, India 793101.*

<sup>‡</sup>Both the authors contributed equally

Corresponding Authors \*E-mail: [kusum@tezu.ernet.in](mailto:kusum@tezu.ernet.in).

ORCID: 0000-0001-6535-3913

## **1. Material and Physical Measurements**

### **1.1 Material Used**

Silver sulfide ( $\text{Ag}_2\text{S}$ ) and vanadium pentoxide ( $\text{V}_2\text{O}_5$ ) was procured from Sigma Aldrich and E-Merck, respectively. The solvents (Acetonitrile and Ethanol) employed during the synthesis procedure were purchased from E-Merck. HCl used during the UV analysis was procured from E-Merck.

### **1.2 Physical Measurement**

XRD data's were recorded in a BRUKER AXS, D8 FOCUS instrument and low angle measurement from 10-80°.

Fourier-transform infrared spectra (FT-IR) of the materials were recorded on a Perkin-Elmer Spectrum 2000 FT-IR spectrometer in the range of 500-4000  $\text{cm}^{-1}$ .

The SEM images and EDX analysis of  $\text{Ag}_2\text{S}$  and  $\text{V}_2\text{O}_5$  were recorded in scanning electron microscopy of Model- Zeiss, Sigma and Make- Carl ZEISS Microscopy, Germany at an acceleration voltage of 5 kV.

The Raman analysis of the material was obtained in an EZRaman-N (Enwave Optronics) Raman Spectrophotometer, having laser light of 150 mW, 785 nm incident wavelength through 100x (0.3 N.A) objective lens.

The X-ray photoelectron spectroscopy (XPS) of the sample was measured using Mg  $\text{K}\alpha$  (1253.6 eV) radiation as a source on a KRATOS (ESCA AXIS 165) spectrometer. The oven-dried samples (finely ground) were dusted on a graphite sheet (double stick) and mounted over the regular sample holder, before being transferred to an analysis chamber. Before recording the XPS, the material was outgassed overnight in a vacuum oven.

ESI-mass spectrums were recorded on ESI mass spectrometer from Agilent Technologies (1220 Infinity LC). High resolution mass spectrometry (HRMS) was recorded in a Q-Tof

ESI-MS instrument (model HAB 273) in acetonitrile (HPLC-grade). UV-vis absorption spectra for red solution were measured in Shimadzu, UV-2550 spectrophotometer.

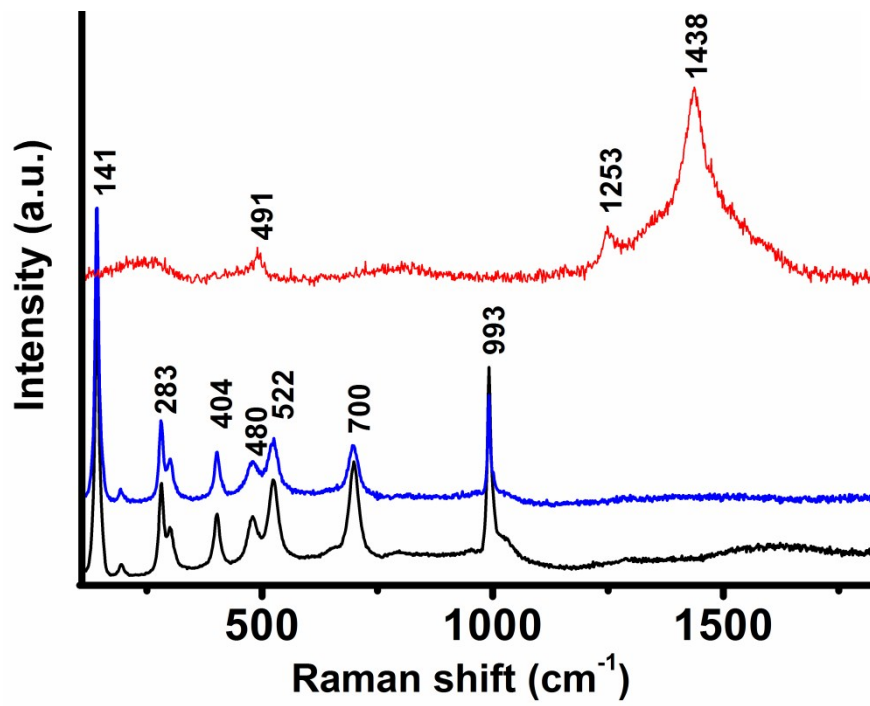

**Fig. S1** Raman spectra of XRD pattern of V<sub>2</sub>O<sub>5</sub> (black), Ag<sub>2</sub>S (red) and V<sub>2</sub>O<sub>5</sub>-Ag<sub>2</sub>S (blue).

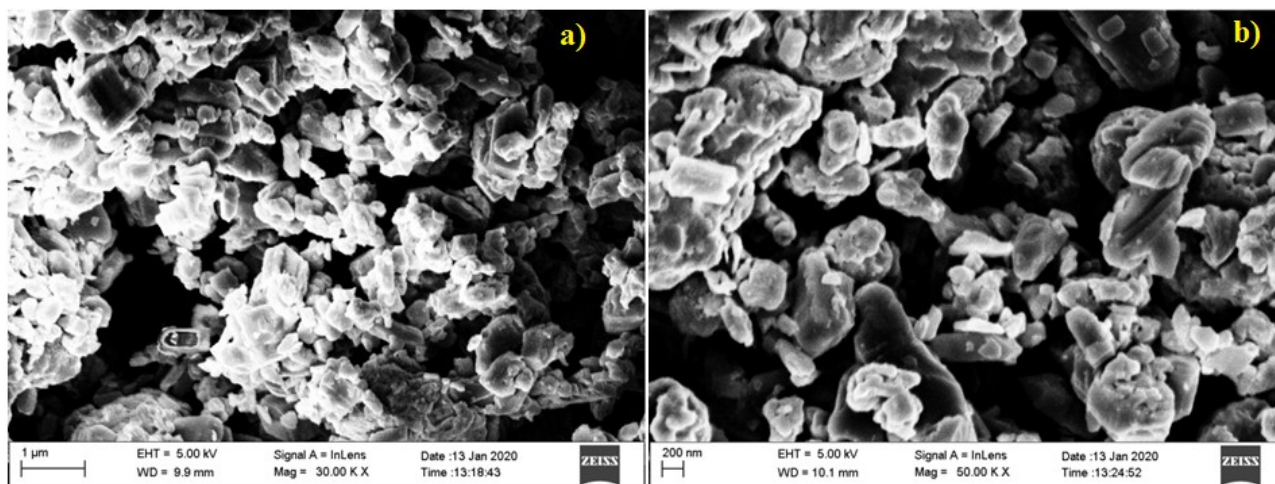

**Fig. S2** SEM images (a-b) of  $V_2O_5$ - $Ag_2S$  (1:1 ratio) composite in different magnification.

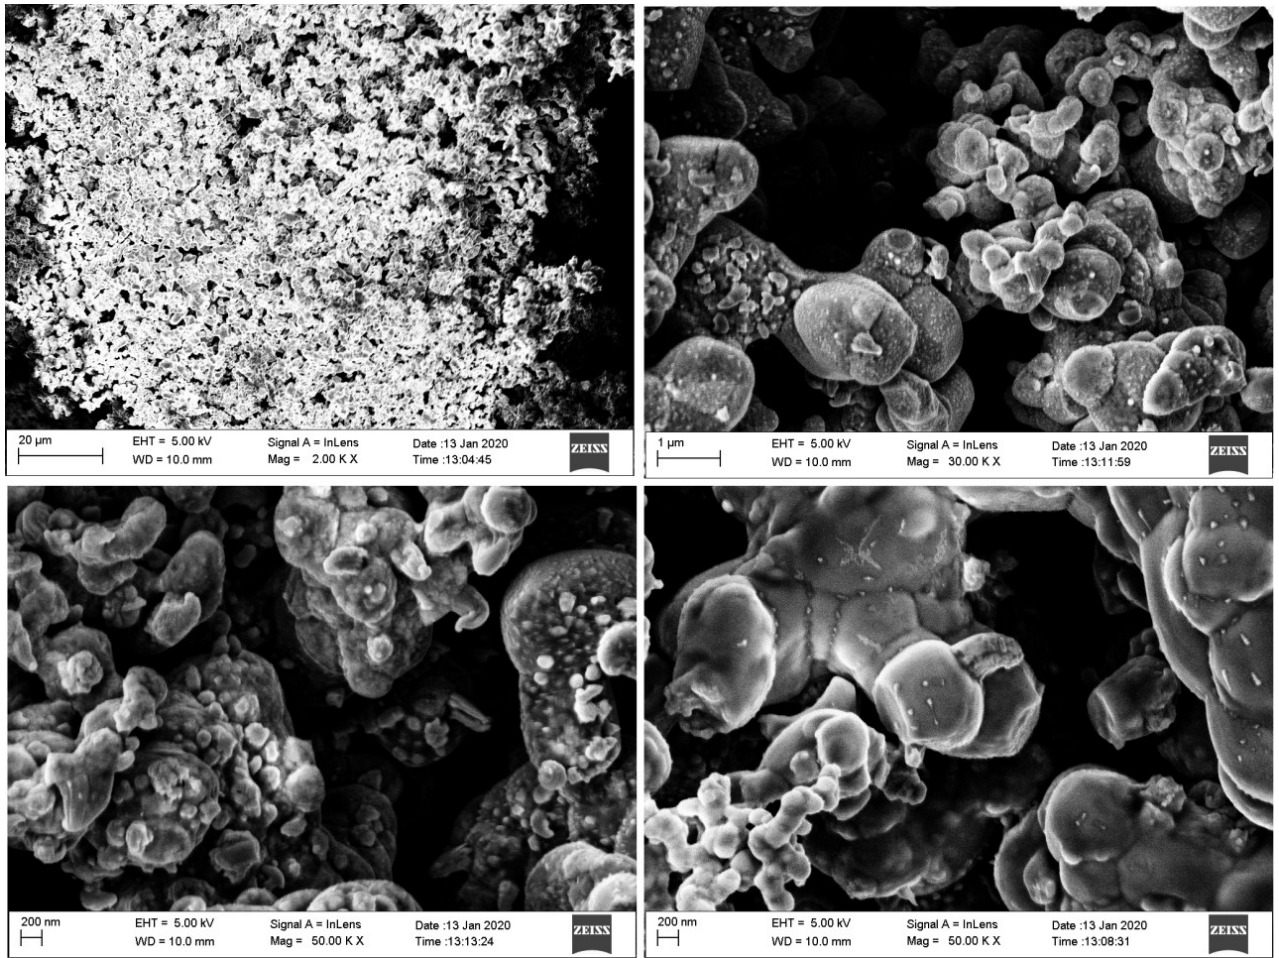

**Fig. S3** SEM images of  $\text{Ag}_2\text{S}$ .

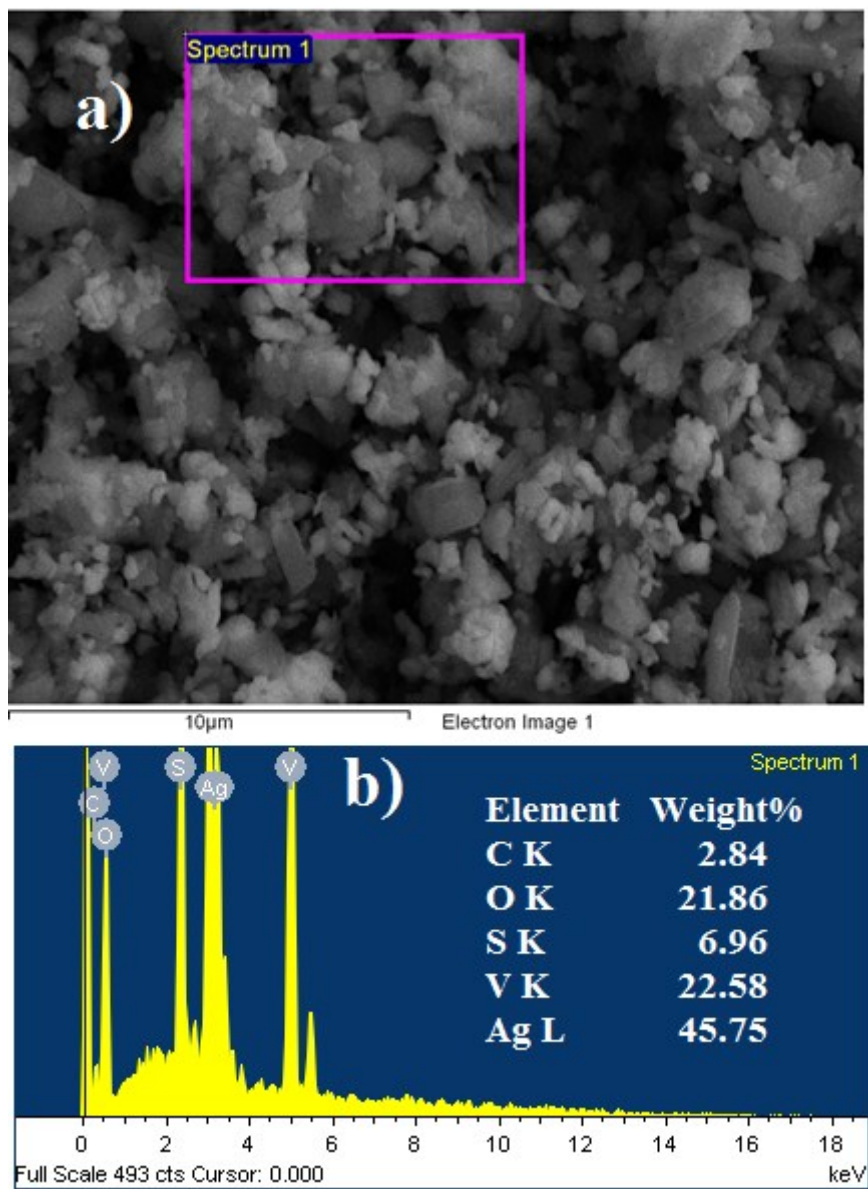

**Fig. S4** EDX analysis of the  $V_2O_5$ - $Ag_2S$  (1:1 ratio) composite.

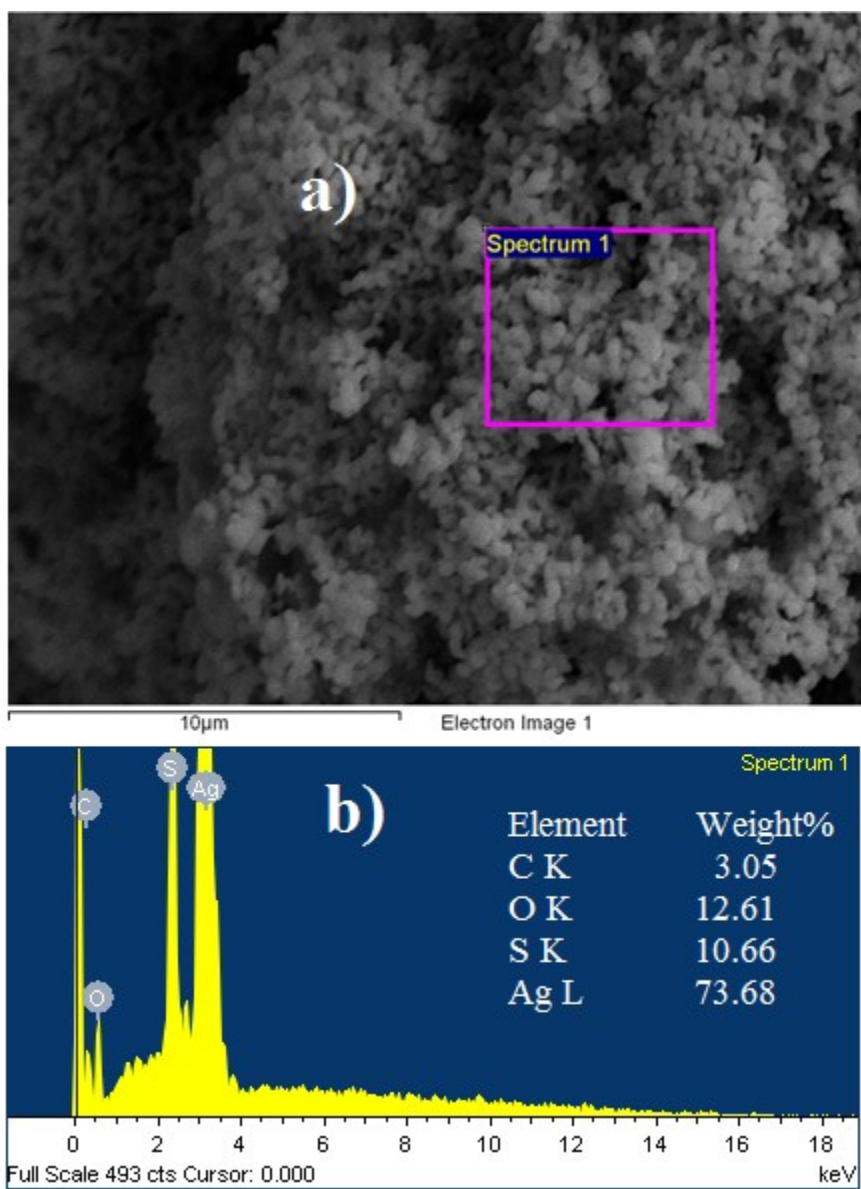

**Fig. S5** EDX analysis of the  $\text{Ag}_2\text{S}$ .



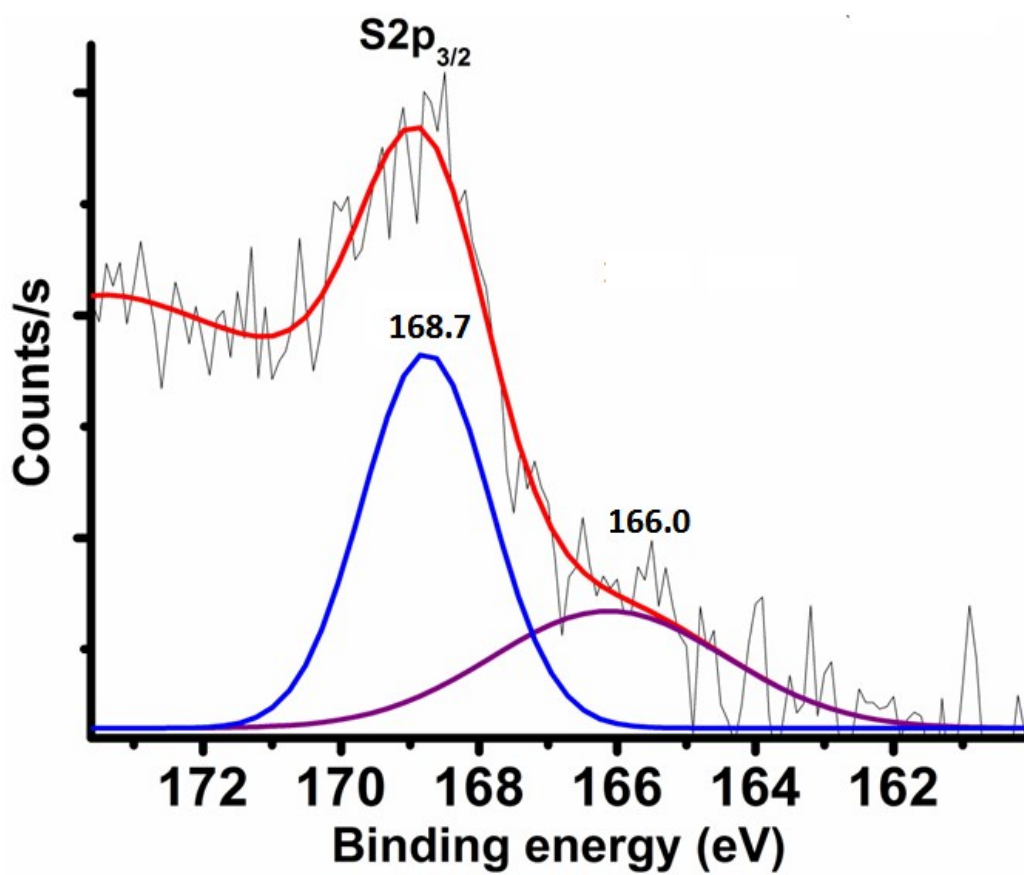

Fig. S6 XPS spectra for sulfur of the V<sub>2</sub>O<sub>5</sub>-Ag<sub>2</sub>S composite on after solid state grinding.

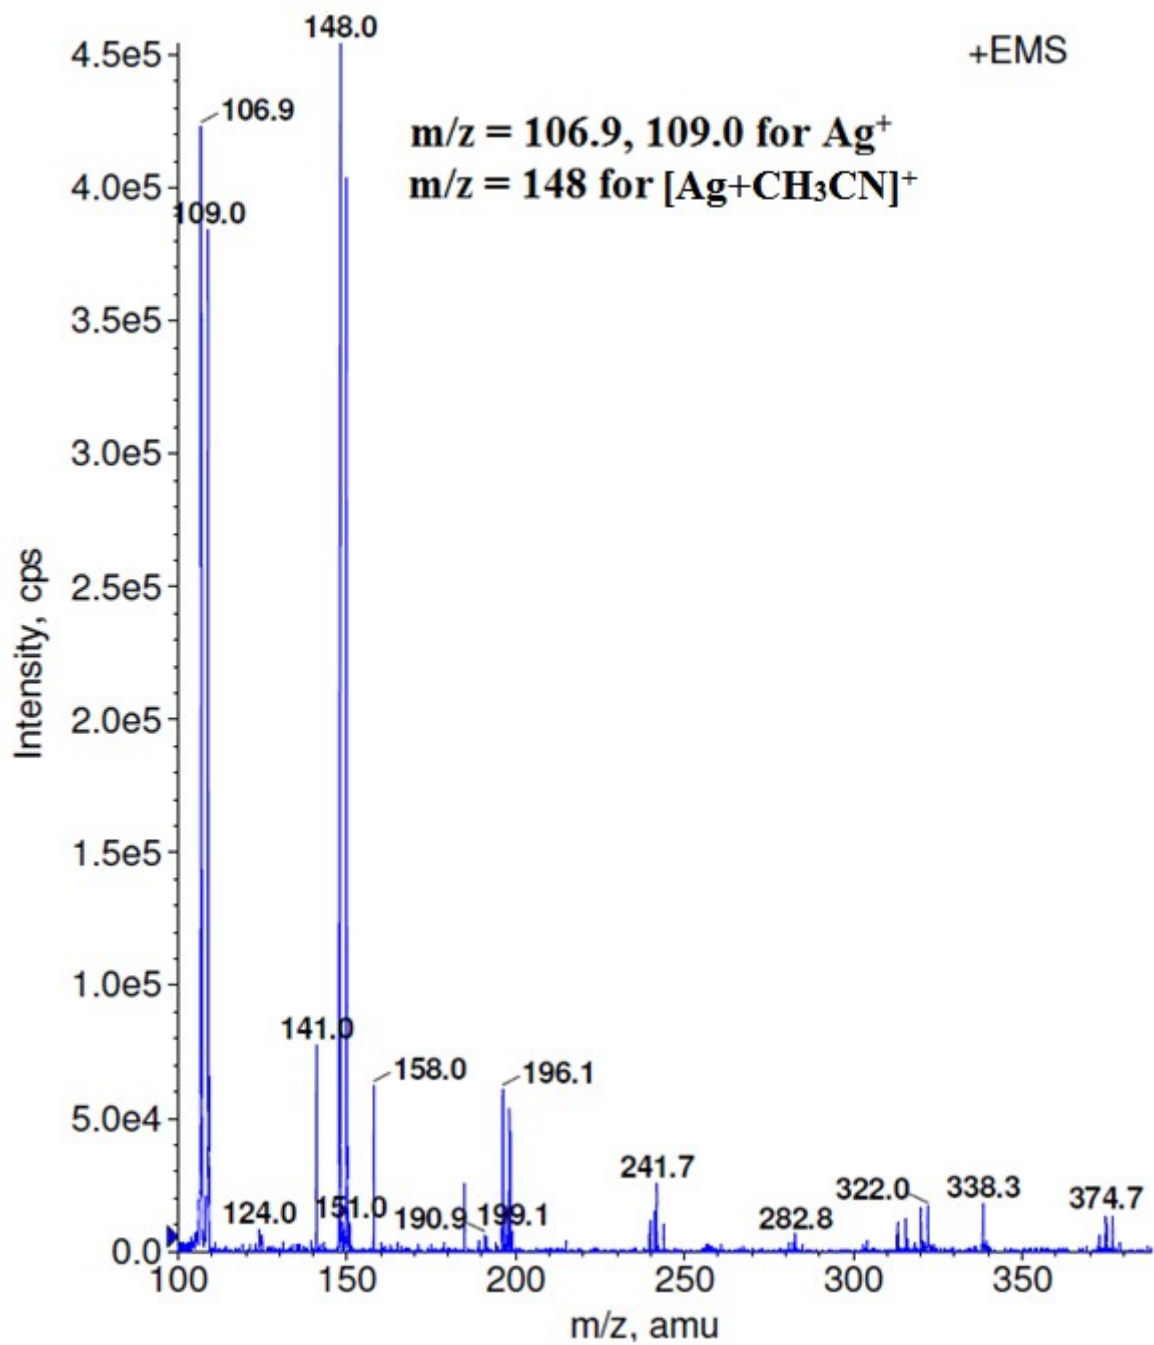

Fig. S7 +ESI-MS of the reddish solution before AgCN extraction.

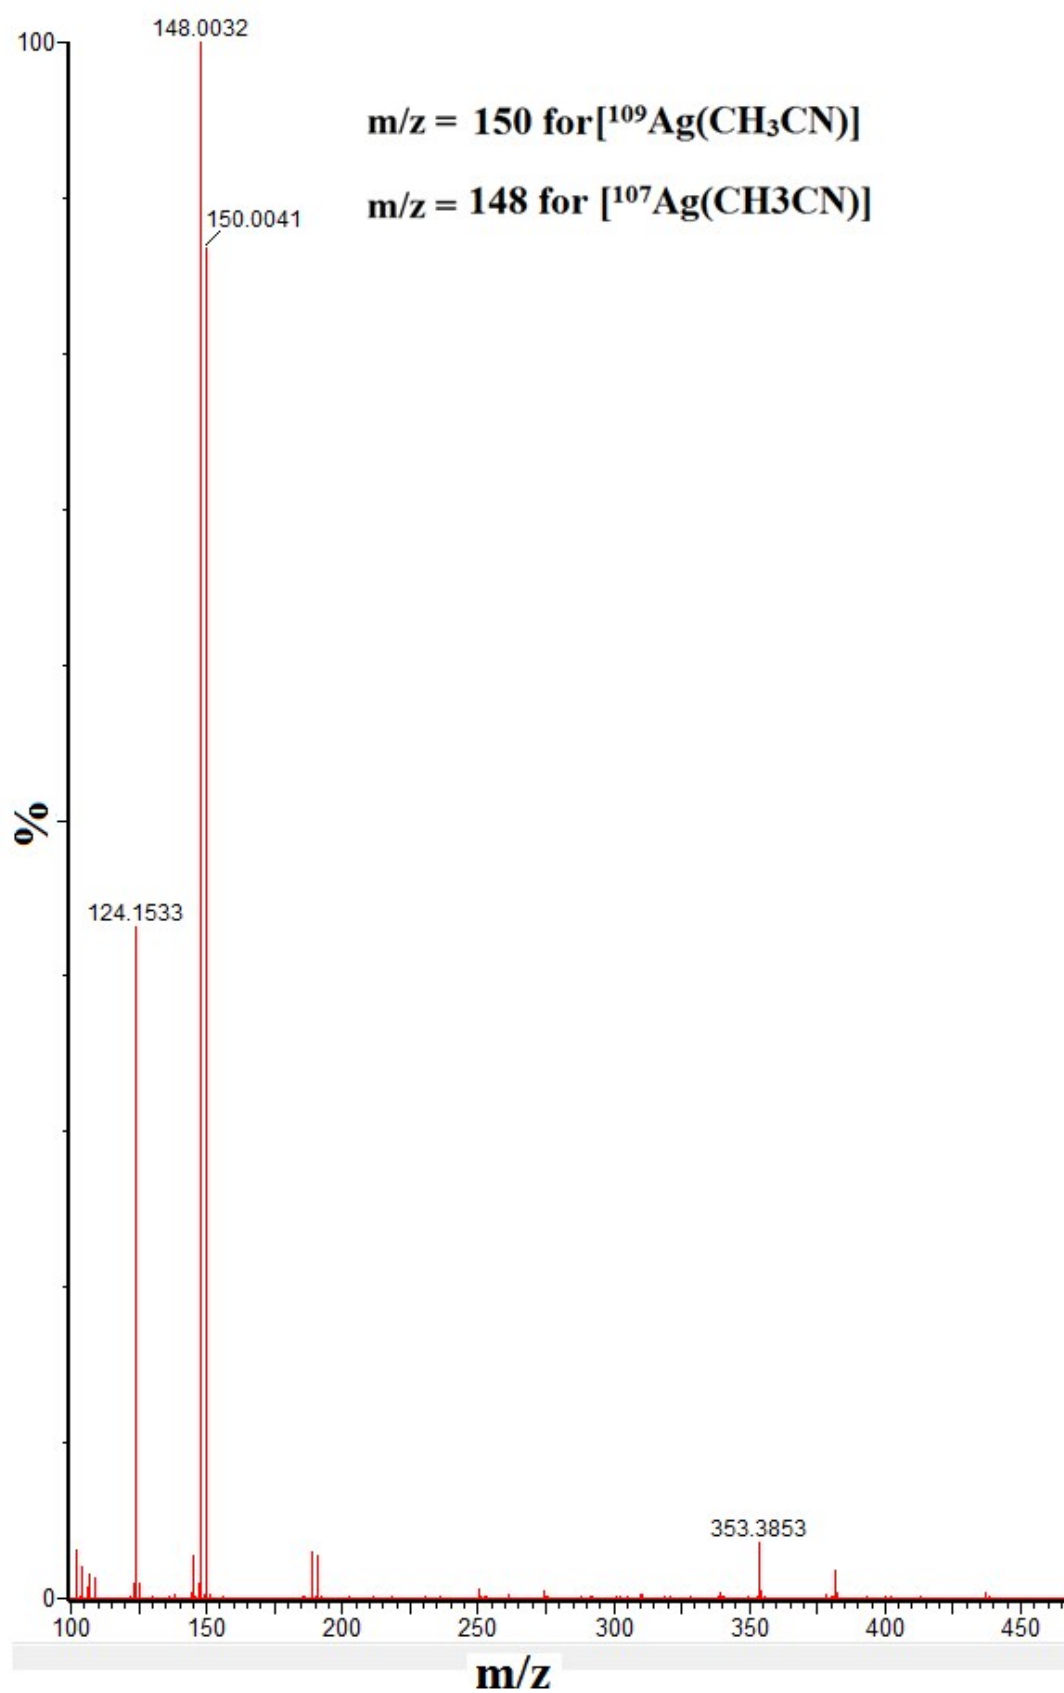

**Fig. S8** HRMS of the reddish solution before AgCN extraction.

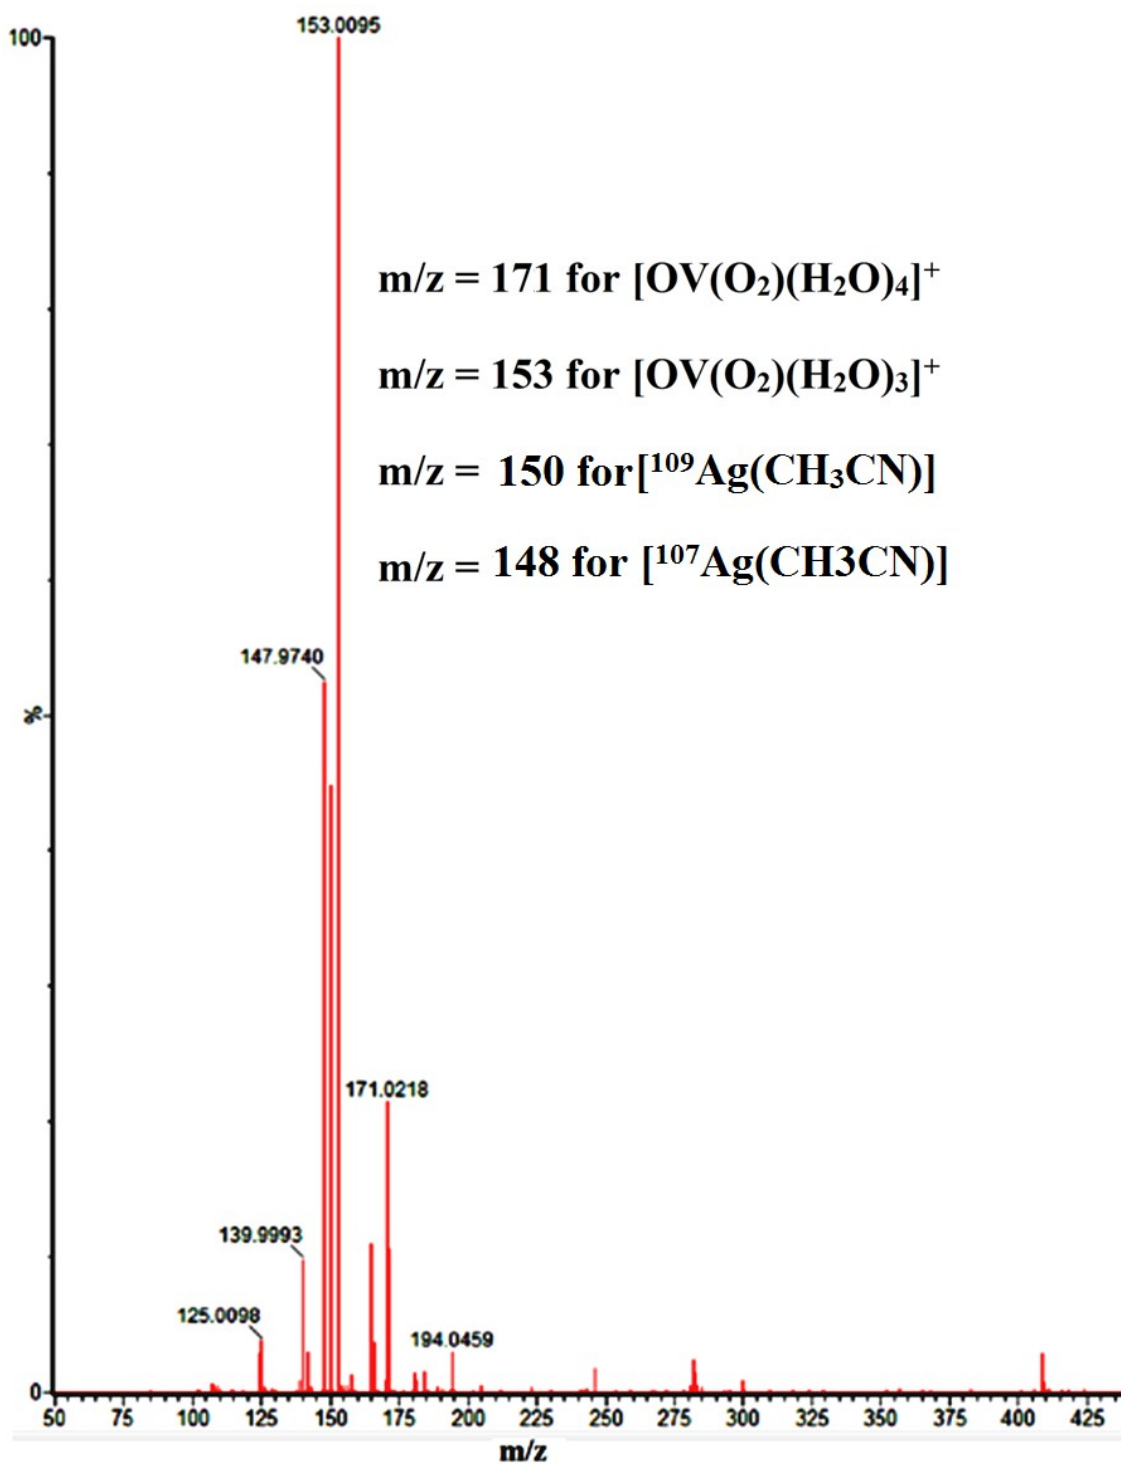

Fig. S9 HRMS of the aliquot after separation AgCN.
